# Supplementary material for: A Novel Membrane-like 2D A’-MoS2 as Anode for Lithium- and Sodium-Ion Batteries
Source: MDPI journal article supplement (doi:10.3390/membranes12111156), 2022-11-16
Supplement: s1 [file s1]

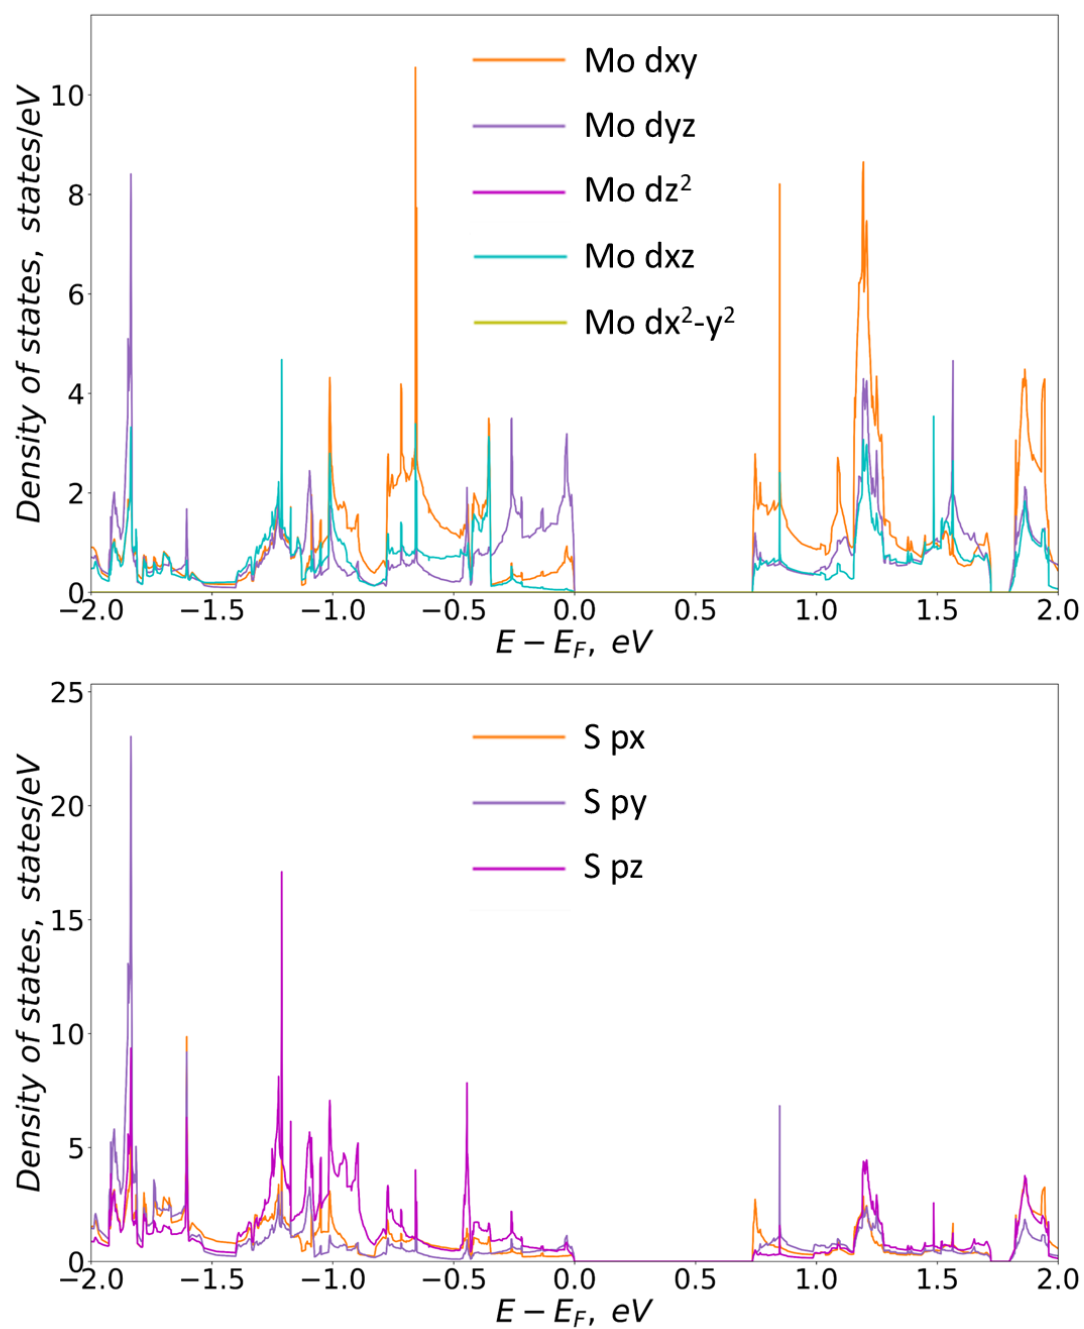

Figure S1. Density of electronic states structure resolved by d-orbitals for Mo atoms and by p-orbitals for S atoms for A'-MoS<sub>2</sub>.

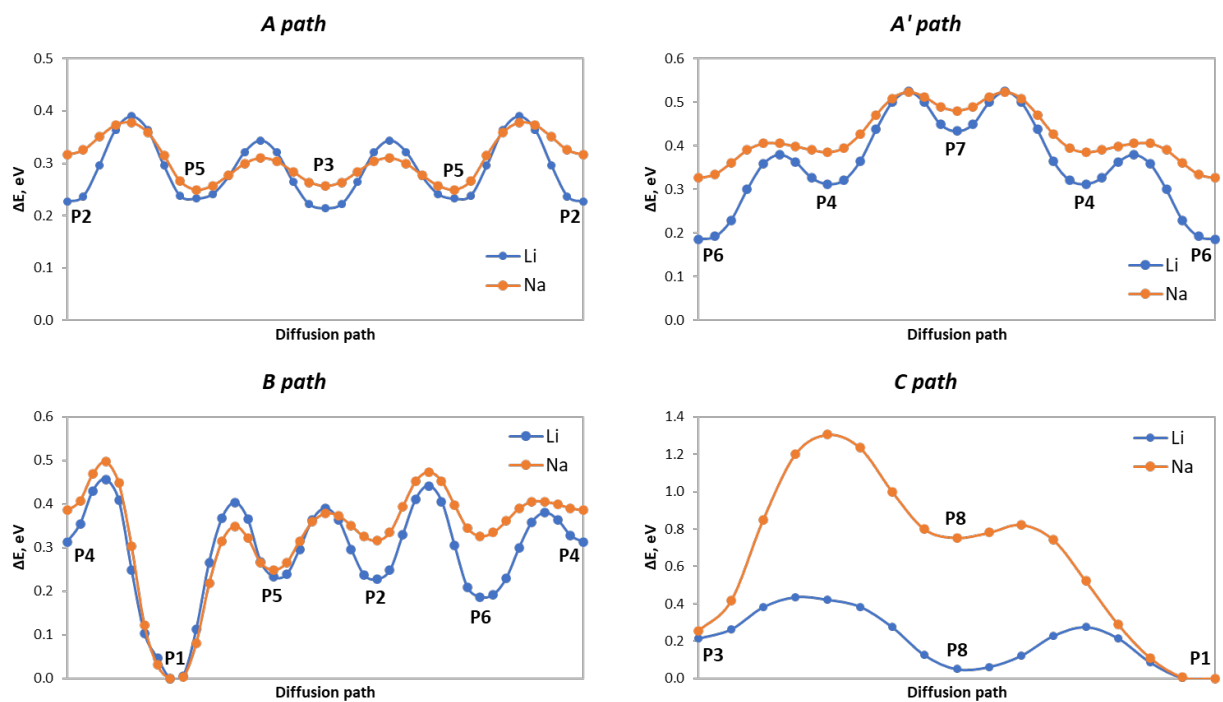

Figure S2. Diffusion energy profiles for Li (blue) and Na (orange) atoms diffusion barriers in different considered directions for A'-MoS<sub>2</sub>.
